# Supplementary material for: Prevention of Cytotoxic T Cell Escape Using a Heteroclitic Subdominant Viral T Cell Determinant
Source: PLoS Pathog. 2008 Oct 24;4(10):e1000186. doi: 10.1371/journal.ppat.1000186 (PMC2563037; doi:10.1371/journal.ppat.1000186)
Supplement: Table S1 — Data collection and refinement statistics. (0.06 MB DOC) [file ppat.1000186.s004.doc]

Table S1. Data collection and refinement statistics

| Structure | | **H-2KbS598-Aba** | | **H-2KbS598-Q600Y-Aba** |
| --- | --- | --- | --- | --- |
| Wavelength (Å) | | 1.54178 | | 1.54178 |
| Resolution limits (Å)a | | 24.46 – 1.80 (1.90 – 1.80) | | 27.00 – 2.80 (2.91 – 2.80) |
| Space group | | *P*21 | | *P*1 |
| Unit-cell parameters (Å) | | *a* = 66.49, *b* = 89.54, *c* = 89.93 Å   = 111.68° | | *a* = 66.71, *b* = 90.15, *c* = 91.97 Å   = 81.11,  = 70.58,  = 68.25° |
| No. observations | | 258,132 | | 109,505 |
| No. unique reflections | | 90,277 | | 48,224 |
| Mosaicity | | 0.80 | | 0.80 |
| Completeness (%)a | | 99.6 (99.5) | | 95.8 (85.6) |
| *R*merge (%) a,b | | 4.6 (38.5) | | 10.1 (30.3) |
| < *I*/(*I*) >a | | 18.0 (2.0) | | 10.0 (2.1) |
| Multiplicitya | | 2.9 (2.7) | | 2.3 (2.1) |
| R-factor (%)c | 20.8 | | 20.7 | |
| R-free (%)d | 25.1 | | 25.3 | |
| Number of atoms:  - protein  - peptide  - water  - other | 6,081  128  607  60 | | 11,994  268  136  - | |
| Average B-factor (Å2):  - protein  - peptide  - water  - other | 23.7  19.4  30.5  44.9 | | 47.6  47.5  32.7  - | |
| rmsd bonds (Å) | 0.017 | | 0.019 | |
| rmsdangles (°) | 1.61 | | 1.66 | |

a Values in parentheses refer to the highest resolution bin.

b Rmerge = shkl i | Ihkl, i - <Ihkl> | / hkl <Ihkl>

c Rfactor = (  | |Fo| - |Fc| | ) / ( |Fo| ) - for all data except as indicated in footnote d.

d 5% of data was used for the Rfree calculation (see footnote c).
